# Supplementary material for: A Comparative Study of Radiomics and Deep-Learning Based Methods for Pulmonary Nodule Malignancy Prediction in Low Dose CT Images
Source: PubMed Central journal article supplement (PMC8718670; doi:10.3389/fonc.2021.737368), 2021-12-17
Supplement: DataSheet_1.pdf [file DataSheet_1.pdf]

# Supplementary Material

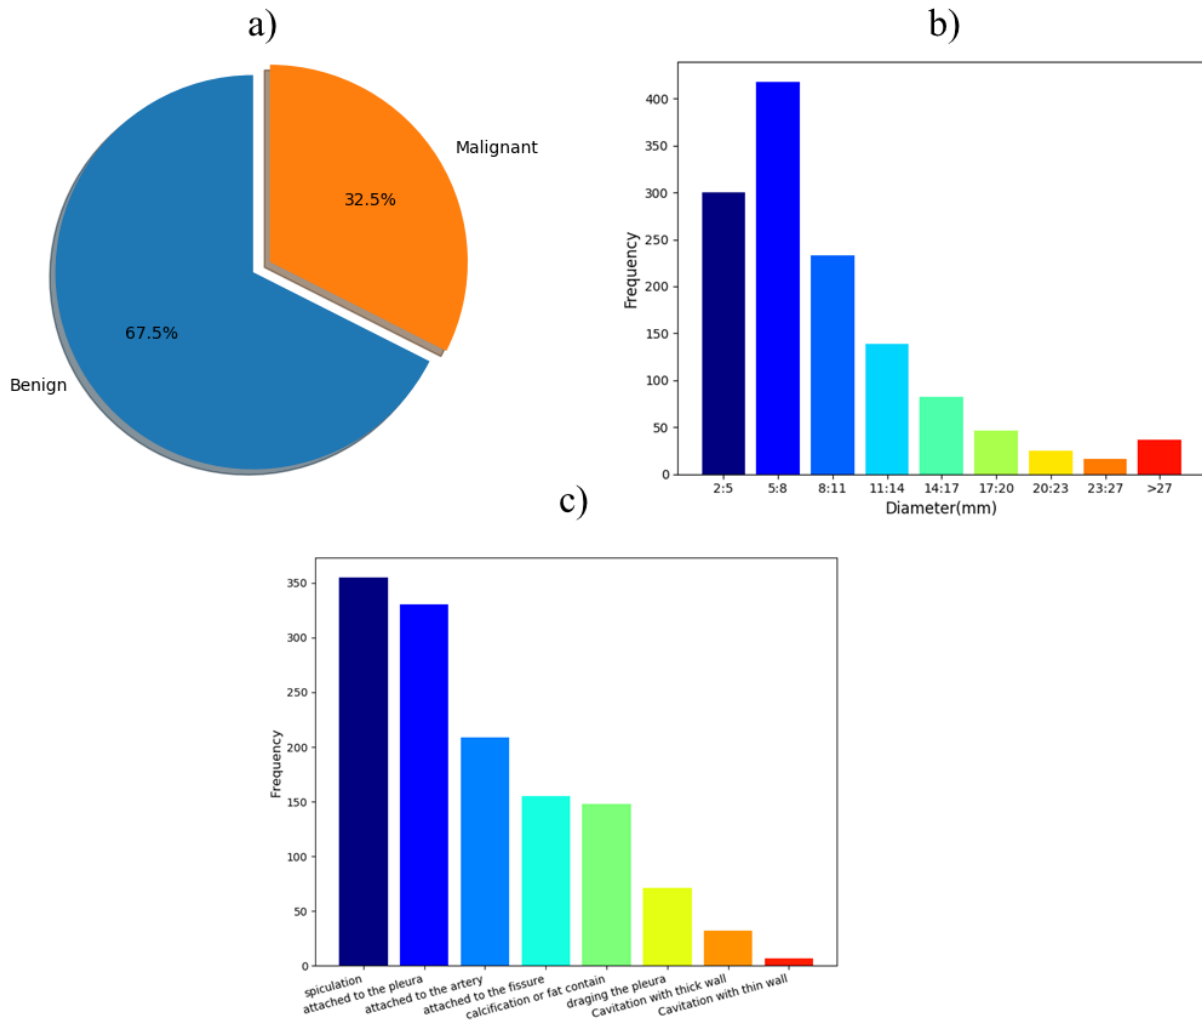

Figure 1. Distribution of the 1297 segmented lung nodules; a) proportion of the lung nodules with respect to class labels; b) frequency of the nodules in terms of nodules diameter; c) frequency of the nodules with respect to radiological attributes.

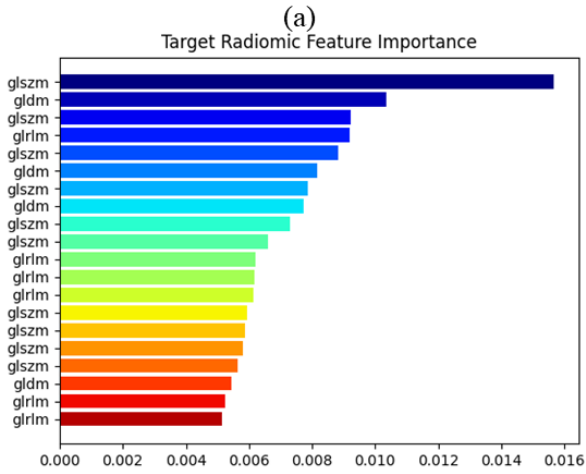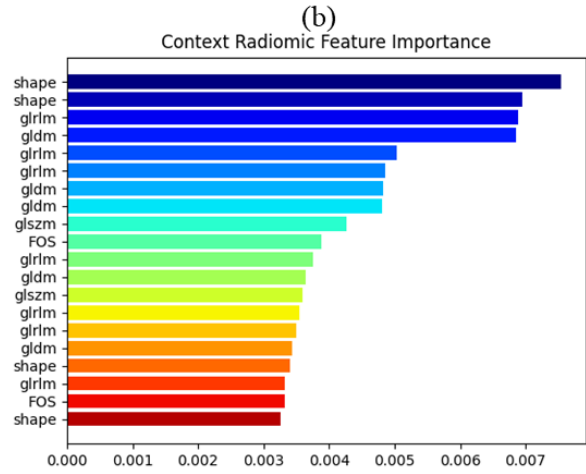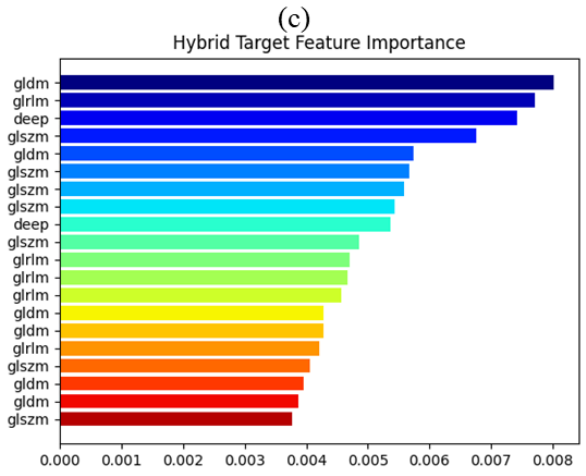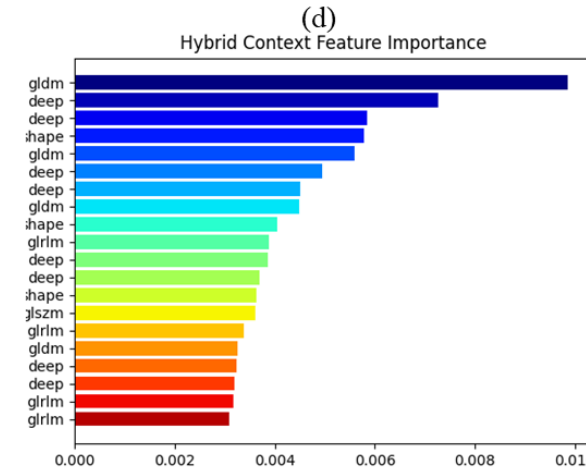

Figure 2. Illustration of the top 20 important features contributed to the prediction. Plots (a) and (b) show the features with significant contribution in the target radiomics and context radiomics, respectively. Plots (c) and (d) represent the important features of hybrid target and hybrid context feature sets, respectively.

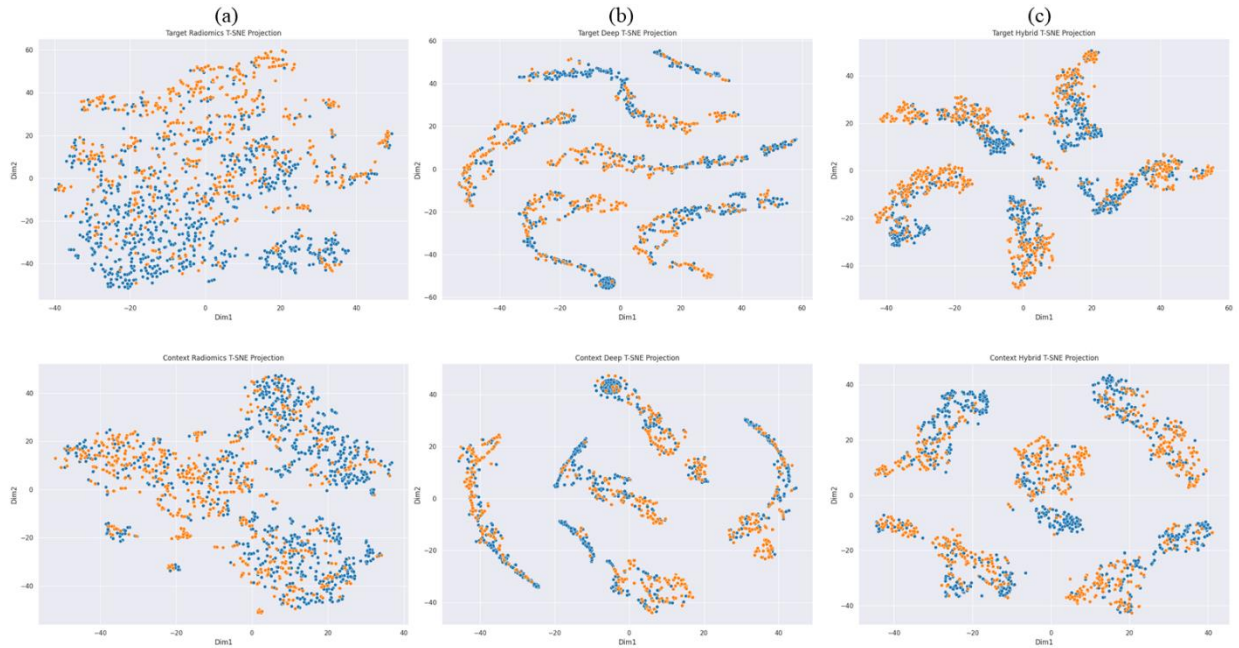

Figure 3. 2D visualization of feature space with respect to the class labels after nonlinearly reduced the dimensionalities by PCA and TSNE. Columns (a), (b), and (c) show the scatter plots corresponding to radiomics, deep, and hybrid feature pools. The first row shows the features extracted and learned from target nodule and the second row demonstrates the context nodule based features.

Table 1. Extracted radiomic features.

| Radiomic Features                      |               |                                                                                                                                                                                                                                                                                                                                                                                                         |
|----------------------------------------|---------------|---------------------------------------------------------------------------------------------------------------------------------------------------------------------------------------------------------------------------------------------------------------------------------------------------------------------------------------------------------------------------------------------------------|
| Category                               | # of features | Names                                                                                                                                                                                                                                                                                                                                                                                                   |
| First-order statistics                 | 18            | 10Percentile, 90Percentile, Energy, Entropy, InterquartileRange, Kurtosis, Maximum, MeanAbsoluteDeviation, Mean, Median, Minimum, Range, RobustMeanAbsoluteDeviation, RootMeanSquared, Skewness, TotalEnergy, Uniformity, Variance                                                                                                                                                                      |
| Geometric                              | 14            | Elongation, Flatness, LeastAxisLength, MajorAxisLength, Maximum2DDiameterColumn, Maximum2DDiameterRow, Maximum2DDiameterSlice, Maximum3DDiameter, MeshVolume, MinorAxisLength, Sphericity, SurfaceArea, SurfaceVolumeRatio, VoxelVolume                                                                                                                                                                 |
| Gray level co-occurrence matrix        | 24            | Autocorrelation, ClusterProminence, ClusterShade, ClusterTendency, Contrast, Correlation, DifferenceAverage, DifferenceEntropy, DifferenceVariance, Id, Idm, Idmn, Idn, Imc1, Imc2, InverseVariance, JointAverage, JointEnergy, JointEntropy, MCC, MaximumProbability, SumAverage, SumEntropy, SumSquares                                                                                               |
| Gray level run-length matrix           | 16            | GrayLevelNonUniformity, GrayLevelNonUniformityNormalized, GrayLevelVariance, HighGrayLevelRunEmphasis, LongRunEmphasis, LongRunHighGrayLevelEmphasis, LongRunLowGrayLevelEmphasis, LowGrayLevelRunEmphasis, RunEntropy, RunLengthNonUniformity, RunLengthNonUniformityNormalized, RunPercentage, RunVariance, ShortRunEmphasis, ShortRunHighGrayLevelEmphasis, ShortRunLowGrayLevelEmphasis             |
| Gray level size-zone matrix            | 16            | GrayLevelNonUniformity, GrayLevelNonUniformityNormalized, GrayLevelVariance, HighGrayLevelZoneEmphasis, LargeAreaEmphasis, LargeAreaHighGrayLevelEmphasis, LargeAreaLowGrayLevelEmphasis, LowGrayLevelZoneEmphasis, SizeZoneNonUniformity, SizeZoneNonUniformityNormalized, SmallAreaEmphasis, SmallAreaHighGrayLevelEmphasis, SmallAreaLowGrayLevelEmphasis, ZoneEntropy, ZonePercentage, ZoneVariance |
| Gray level dependence matrix           | 14            | DependenceEntropy, DependenceNonUniformity, DependenceNonUniformityNormalized, DependenceVariance, GrayLevelNonUniformity, GrayLevelVariance, HighGrayLevelEmphasis, LargeDependenceEmphasis, LargeDependenceHighGrayLevelEmphasis, LargeDependenceLowGrayLevelEmphasis, LowGrayLevelEmphasis, SmallDependenceEmphasis, SmallDependenceHighGrayLevelEmphasis, SmallDependenceLowGrayLevelEmphasis       |
| Multi-scale Wavelet                    | 704           | First-order statistics and textural features were extracted from 8 levels of Wavelet decompositions                                                                                                                                                                                                                                                                                                     |
| Multiscale Laplacian of Gaussian (LoG) | 528           | First-order statistics and textural features were extracted from LoG images with Gaussian radius varied from 0.5 to 3 (0.5 increments)                                                                                                                                                                                                                                                                  |

Table 2. The prediction power of the radiomic features extracted from target nodule images with different learning algorithms and feature selection methods over the unbalanced dataset. For each feature selection algorithm, the highest value is marked in bold.

| Learning Algorithm | Target Nodule Radiomic Prediction Performance (AUC) |                    |                    |                    |                    |                    |                    |                    |
|--------------------|-----------------------------------------------------|--------------------|--------------------|--------------------|--------------------|--------------------|--------------------|--------------------|
|                    | Feature Selection                                   |                    |                    |                    |                    |                    |                    |                    |
|                    | None                                                | CST                | Corr               | LASSO              | RELIEF             | MI                 | PCA                | FFS                |
| Adab               | 0.779±0.032                                         | 0.766±0.033        | 0.752±0.025        | 0.746±0.028        | 0.626±0.015        | 0.611±0.035        | 0.755±0.035        | 0.823±0.016        |
| DT                 | 0.631±0.027                                         | 0.620±0.032        | 0.594±0.032        | 0.613±0.026        | 0.604±0.029        | 0.568±0.015        | 0.619±0.033        | 0.677±0.046        |
| RF                 | <b>0.792±0.025</b>                                  | <b>0.788±0.031</b> | <b>0.770±0.025</b> | 0.761±0.027        | 0.765±0.027        | 0.592±0.051        | <b>0.772±0.032</b> | <b>0.825±0.025</b> |
| KNN                | 0.756±0.020                                         | 0.744±0.026        | 0.725±0.030        | 0.748±0.030        | 0.714±0.023        | 0.600±0.059        | 0.744±0.028        | 0.792±0.021        |
| SVM                | 0.779±0.027                                         | 0.778±0.031        | 0.762±0.032        | <b>0.779±0.032</b> | 0.763±0.025        | 0.570±0.041        | 0.749±0.031        | 0.771±0.031        |
| LDA                | 0.577±0.022                                         | 0.555±0.018        | 0.763±0.035        | 0.773±0.034        | <b>0.770±0.038</b> | <b>0.720±0.036</b> | 0.762±0.031        | 0.801±0.020        |
| QDA                | 0.518±0.020                                         | 0.512±0.016        | 0.714±0.029        | 0.768±0.035        | 0.752±0.038        | 0.626±0.026        | 0.753±0.029        | 0.808±0.024        |
| Naive              | 0.765±0.033                                         | 0.765±0.033        | 0.753±0.030        | 0.760±0.034        | 0.761±0.041        | 0.574±0.032        | 0.749±0.038        | 0.795±0.018        |

Table 3. The prediction power of the radiomic features extracted from context nodule images with different learning algorithms and feature selection methods over the unbalanced dataset. For each feature selection algorithm, the highest value is marked in bold.

| Learning Algorithm | Context Nodule Radiomic Prediction Performance (AUC) |                    |                    |                    |                    |                    |                    |                    |
|--------------------|------------------------------------------------------|--------------------|--------------------|--------------------|--------------------|--------------------|--------------------|--------------------|
|                    | Feature Selection                                    |                    |                    |                    |                    |                    |                    |                    |
|                    | None                                                 | CST                | Corr               | LASSO              | RELIEF             | MI                 | PCA                | FFS                |
| Adab               | 0.761±0.023                                          | 0.657±0.034        | 0.685±0.026        | 0.690±0.038        | 0.574±0.045        | 0.590±0.055        | 0.672±0.030        | 0.772±0.025        |
| DT                 | 0.609±0.039                                          | 0.565±0.035        | 0.555±0.022        | 0.583±0.039        | 0.547±0.026        | 0.558±0.031        | 0.564±0.020        | 0.666±0.020        |
| RF                 | <b>0.777±0.017</b>                                   | <b>0.680±0.035</b> | <b>0.713±0.053</b> | <b>0.713±0.057</b> | 0.586±0.043        | 0.595±0.059        | <b>0.711±0.037</b> | 0.794±0.044        |
| KNN                | 0.746±0.022                                          | 0.651±0.020        | 0.672±0.043        | 0.672±0.024        | 0.592±0.022        | 0.548±0.019        | 0.661±0.025        | 0.700±0.027        |
| SVM                | 0.776±0.016                                          | 0.670±0.049        | 0.683±0.033        | 0.707±0.050        | 0.677±0.052        | 0.549±0.030        | 0.694±0.049        | 0.799±0.029        |
| LDA                | 0.542±0.056                                          | 0.657±0.035        | 0.682±0.052        | 0.701±0.041        | <b>0.722±0.067</b> | <b>0.644±0.033</b> | 0.725±0.043        | <b>0.818±0.031</b> |
| QDA                | 0.523±0.027                                          | 0.677±0.037        | 0.674±0.032        | 0.706±0.039        | 0.718±0.053        | 0.499±0.001        | 0.701±0.035        | 0.788±0.024        |
| Naive              | 0.762±0.013                                          | 0.673±0.036        | 0.681±0.021        | 0.702±0.042        | 0.670±0.056        | 0.561±0.057        | 0.686±0.044        | 0.798±0.031        |

Table 4. The prediction power of the joint target and context radiomic features with different learning algorithms and feature selection methods over the unbalanced dataset. For each feature selection algorithm, the highest value is marked in bold.

| Learning Algorithm | Combined Nodule Radiomic Prediction Performance (AUC) |                    |                    |                    |                    |                    |                    |                    |
|--------------------|-------------------------------------------------------|--------------------|--------------------|--------------------|--------------------|--------------------|--------------------|--------------------|
|                    | Feature Selection                                     |                    |                    |                    |                    |                    |                    |                    |
|                    | None                                                  | CST                | Corr               | LASSO              | RELIEF             | MI                 | PCA                | FFS                |
| Adab               | 0.762±0.010                                           | 0.748±0.012        | 0.752±0.024        | 0.759±0.030        | 0.482±0.029        | 0.620±0.034        | 0.718±0.033        | <b>0.845±0.011</b> |
| DT                 | 0.652±0.012                                           | 0.616±0.020        | 0.585±0.012        | 0.628±0.017        | 0.480±0.032        | 0.552±0.025        | 0.603±0.037        | 0.687±0.047        |
| RF                 | 0.773±0.022                                           | <b>0.750±0.019</b> | <b>0.761±0.022</b> | <b>0.776±0.020</b> | 0.568±0.022        | <b>0.662±0.059</b> | <b>0.741±0.038</b> | 0.826±0.012        |
| KNN                | 0.691±0.026                                           | 0.680±0.027        | 0.665±0.028        | 0.693±0.052        | 0.561±0.026        | 0.615±0.058        | 0.690±0.035        | 0.770±0.022        |
| SVM                | <b>0.774±0.015</b>                                    | 0.706±0.033        | 0.672±0.041        | 0.707±0.035        | 0.600±0.029        | 0.618±0.078        | 0.714±0.035        | 0.795±0.016        |
| LDA                | 0.555±0.021                                           | 0.720±0.037        | 0.738±0.013        | 0.741±0.037        | <b>0.694±0.026</b> | 0.567±0.045        | 0.734±0.041        | 0.821±0.016        |
| QDA                | 0.541±0.027                                           | 0.696±0.051        | 0.693±0.037        | 0.724±0.040        | 0.689±0.026        | 0.507±0.007        | 0.712±0.044        | 0.828±0.024        |
| Naive              | 0.734±0.020                                           | 0.692±0.034        | 0.689±0.012        | 0.718±0.035        | 0.639±0.018        | 0.594±0.042        | 0.692±0.035        | 0.814±0.014        |

Table 5. The 20 most informative radiomic features identified with forward feature selection method integrated within different learning algorithms.

| Learning Algorithms | Feature subset                                                                                                                                                                                                                                                                                                                                                                                                                                                                                                                                                                                                                                                                                                                                                                                                                                                        |
|---------------------|-----------------------------------------------------------------------------------------------------------------------------------------------------------------------------------------------------------------------------------------------------------------------------------------------------------------------------------------------------------------------------------------------------------------------------------------------------------------------------------------------------------------------------------------------------------------------------------------------------------------------------------------------------------------------------------------------------------------------------------------------------------------------------------------------------------------------------------------------------------------------|
| Adab                | original_shape_Flatness, original_firstorder_Energy, original_glcM_ClusterProminence<br>log-sigma-0-5-mm-3D_firstorder_RootMeanSquared, log-sigma-0-5-mm-3D_gldm_HighGrayLevelEmphasis<br>log-sigma-1-mm-3D_firstorder_Range, log-sigma-1-mm-3D_glszm_LargeAreaEmphasis<br>log-sigma-1-5-mm-3D_firstorder_Mean, log-sigma-2-mm-3D_glszm_LargeAreaEmphasis<br>log-sigma-2-5-mm-3D_firstorder_Energy, log-sigma-2-5-mm-3D_glszm_LargeAreaHighGrayLevelEmphasis<br>log-sigma-3-mm-3D_firstorder_TotalEnergy, wavelet-LLH_glrIm_RunLengthNonUniformity<br>wavelet-LHL_firstorder_Energy, wavelet-HHL_glszm_LargeAreaHighGrayLevelEmphasis<br>wavelet-HHH_glszm_LargeAreaHighGrayLevelEmphasis, wavelet-LLL_firstorder_RootMeanSquared<br>wavelet-LLL_firstorder_Variance, wavelet-LLL_gldm_HighGrayLevelEmphasis<br>wavelet-LLL_gldm_SmallDependenceHighGrayLevelEmphasis |
| DT                  | original_glcM_ClusterTendency, original_glrIm_GrayLevelNonUniformity<br>original_gldm_GrayLevelNonUniformity, log-sigma-0-5-mm-3D_glcM_Autocorrelation<br>log-sigma-0-5-mm-3D_glrIm_GrayLevelNonUniformity, log-sigma-1-5-mm-3D_firstorder_Minimum<br>log-sigma-1-5-mm-3D_gldm_DependenceNonUniformity, log-sigma-1-5-mm-3D_gldm_GrayLevelNonUniformity<br>log-sigma-2-mm-3D_glrIm_GrayLevelNonUniformity, log-sigma-2-mm-3D_glszm_LargeAreaEmphasis<br>log-sigma-2-5-mm-3D_firstorder_10Percentile, log-sigma-2-5-mm-3D_glcM_ClusterShade<br>wavelet-LHL_glrIm_LongRunHighGrayLevelEmphasis, wavelet-HLL_firstorder_Variance<br>wavelet-HLL_glcM_ClusterProminence, wavelet-HLL_gldm_LargeDependenceEmphasis<br>wavelet-LLL_firstorder_10Percentile, wavelet-LLL_firstorder_MeanAbsoluteDeviation<br>wavelet-LLL_glrIm_GrayLevelNonUniformity                        |
| RF                  | original_firstorder_Energy, log-sigma-1-mm-3D_firstorder_Variance, log-sigma-1-mm-3D_glszm_ZoneVariance<br>log-sigma-2-mm-3D_firstorder_Range, log-sigma-2-mm-3D_firstorder_TotalEnergy<br>log-sigma-2-mm-3D_firstorder_Variance, log-sigma-2-mm-3D_glszm_LargeAreaEmphasis<br>log-sigma-2-5-mm-3D_firstorder_Energy, log-sigma-2-5-mm-3D_firstorder_Range<br>log-sigma-2-5-mm-3D_glrIm_GrayLevelNonUniformity<br>log-sigma-2-5-mm-3D_glszm_LargeAreaHighGrayLevelEmphasis<br>log-sigma-2-5-mm-3D_gldm_LargeDependenceHighGrayLevelEmphasis<br>log-sigma-3-mm-3D_firstorder_TotalEnergy, log-sigma-3-mm-3D_glcM_ClusterProminence<br>wavelet-LLH_firstorder_TotalEnergy, wavelet-LHL_firstorder_Energy, wavelet-HLL_firstorder_Energy                                                                                                                                 |

|       |                                                                                                                                                                                                                                                                                                                                                                                                                                                                                                                                                                                                                                                                                                                                                                                                                                                                                                                                                                   |
|-------|-------------------------------------------------------------------------------------------------------------------------------------------------------------------------------------------------------------------------------------------------------------------------------------------------------------------------------------------------------------------------------------------------------------------------------------------------------------------------------------------------------------------------------------------------------------------------------------------------------------------------------------------------------------------------------------------------------------------------------------------------------------------------------------------------------------------------------------------------------------------------------------------------------------------------------------------------------------------|
|       | <p>wavelet-LLL_firstorder_Variance, wavelet-LLL_glcm_Autocorrelation<br/> wavelet-LLL_glrIm_ShortRunHighGrayLevelEmphasis</p>                                                                                                                                                                                                                                                                                                                                                                                                                                                                                                                                                                                                                                                                                                                                                                                                                                     |
| KNN   | <p>original_shape_Elongation, original_firstorder_Energy, log-sigma-0-5-mm-3D_glszm_LargeAreaEmphasis<br/> log-sigma-0-5-mm-3D_glszm_LargeAreaHighGrayLevelEmphasis<br/> log-sigma-1-mm-3D_firstorder_Energy, log-sigma-1-5-mm-3D_glszm_LargeAreaEmphasis<br/> log-sigma-1-5-mm-3D_glszm_LargeAreaHighGrayLevelEmphasis, log-sigma-2-mm-3D_firstorder_Energy<br/> log-sigma-3-mm-3D_glszm_LargeAreaHighGrayLevelEmphasis, wavelet-LLH_firstorder_Energy<br/> wavelet-LLH_glszm_LargeAreaEmphasis, wavelet-LLH_glszm_LargeAreaLowGrayLevelEmphasis<br/> wavelet-LLH_glszm_ZoneVariance, wavelet-LHL_firstorder_Energy<br/> wavelet-LHL_glszm_LargeAreaEmphasis, wavelet-HLL_firstorder_Energy<br/> wavelet-HLL_glszm_LargeAreaEmphasis, wavelet-HLL_glszm_LargeAreaHighGrayLevelEmphasis<br/> wavelet-HHL_glszm_ZoneVariance</p>                                                                                                                                   |
| SVM   | <p>original_shape_Elongation, original_shape_Flatness, original_shape_LeastAxisLength<br/> original_shape_MajorAxisLength, original_shape_Maximum2DDiameterColumn<br/> original_shape_Maximum2DDiameterRow, original_shape_Maximum2DDiameterSlice<br/> original_shape_Maximum3DDiameter, original_shape_MeshVolume<br/> original_shape_MinorAxisLength, original_shape_Sphericity, original_shape_SurfaceArea<br/> original_shape_SurfaceVolumeRatio, original_shape_VoxelVolume<br/> original_firstorder_10Percentile, original_firstorder_90Percentile<br/> log-sigma-1-5-mm-3D_glszm_LargeAreaHighGrayLevelEmphasis<br/> wavelet-LHH_glszm_ZoneVariance, wavelet-HHL_glszm_ZoneVariance<br/> wavelet-LLL_glszm_LargeAreaHighGrayLevelEmphasis</p>                                                                                                                                                                                                              |
| LDA   | <p>original_glrIm_GrayLevelNonUniformity, original_gldm_SmallDependenceLowGrayLevelEmphasis<br/> log-sigma-0-5-mm-3D_firstorder_90Percentile, log-sigma-0-5-mm-3D_glszm_LargeAreaEmphasis<br/> log-sigma-1-mm-3D_glszm_LargeAreaHighGrayLevelEmphasis<br/> log-sigma-1-mm-3D_glszm_SmallAreaLowGrayLevelEmphasis<br/> log-sigma-1-5-mm-3D_glszm_LargeAreaHighGrayLevelEmphasis<br/> log-sigma-1-5-mm-3D_glszm_ZoneVariance, log-sigma-2-mm-3D_glrIm_GrayLevelNonUniformity<br/> log-sigma-2-mm-3D_glszm_ZoneVariance, log-sigma-2-5-mm-3D_firstorder_Skewness<br/> log-sigma-3-mm-3D_glszm_LargeAreaEmphasis<br/> log-sigma-3-mm-3D_glszm_SmallAreaLowGrayLevelEmphasis<br/> wavelet-LLH_glcm_ClusterShade, wavelet-HHL_glcm_Imc1<br/> wavelet-HHL_glszm_SmallAreaLowGrayLevelEmphasis, wavelet-HHL_glszm_ZonePercentage<br/> wavelet-HHH_glszm_ZonePercentage, wavelet-LLL_glrIm_GrayLevelNonUniformity<br/> wavelet-LLL_glszm_LargeAreaLowGrayLevelEmphasis</p> |
| QDA   | <p>log-sigma-0-5-mm-3D_firstorder_90Percentile, log-sigma-1-mm-3D_glszm_SmallAreaLowGrayLevelEmphasis<br/> log-sigma-1-5-mm-3D_glszm_LargeAreaEmphasis, log-sigma-1-5-mm-3D_glszm_ZoneVariance<br/> log-sigma-2-5-mm-3D_glcm_ClusterProminence, log-sigma-2-5-mm-3D_glcm_ClusterShade<br/> log-sigma-2-5-mm-3D_glszm_LargeAreaEmphasis, log-sigma-3-mm-3D_glszm_LargeAreaEmphasis<br/> log-sigma-3-mm-3D_gldm_LowGrayLevelEmphasis, wavelet-LLH_firstorder_Variance<br/> wavelet-LLH_glrIm_GrayLevelNonUniformity, wavelet-LLH_glszm_SizeZoneNonUniformity<br/> wavelet-LHL_glrIm_GrayLevelNonUniformity, wavelet-LHH_gldm_DependenceNonUniformity<br/> wavelet-HLL_glrIm_LongRunLowGrayLevelEmphasis, wavelet-HLH_glrIm_GrayLevelNonUniformity<br/> wavelet-HLH_gldm_DependenceNonUniformity, wavelet-HHH_glrIm_RunLengthNonUniformity<br/> wavelet-HHH_glszm_LargeAreaHighGrayLevelEmphasis, wavelet-LLL_firstorder_90Percentile</p>                            |
| Naive | <p>original_shape_Elongation, original_shape_Flatness, original_shape_LeastAxisLength<br/> original_gldm_GrayLevelNonUniformity, original_gldm_LargeDependenceHighGrayLevelEmphasis<br/> log-sigma-1-mm-3D_firstorder_Variance, log-sigma-1-5-mm-3D_glcm_ClusterShade<br/> log-sigma-1-5-mm-3D_glszm_ZoneVariance, log-sigma-2-mm-3D_firstorder_Variance<br/> log-sigma-2-mm-3D_glszm_ZoneVariance, log-sigma-2-mm-3D_gldm_LargeDependenceHighGrayLevelEmphasis<br/> log-sigma-2-5-mm-3D_glcm_ClusterProminence, log-sigma-2-5-mm-3D_gldm_LargeDependenceHighGrayLevelEmphasis, log-sigma-3-mm-3D_glcm_ClusterProminence<br/> log-sigma-3-mm-3D_glszm_LargeAreaLowGrayLevelEmphasis<br/> log-sigma-3-mm-3D_gldm_LargeDependenceHighGrayLevelEmphasis<br/> wavelet-HLL_gldm_LargeDependenceHighGrayLevelEmphasis, wavelet-HHL_firstorder_Energy<br/> wavelet-HHH_glszm_LargeAreaHighGrayLevelEmphasis<br/> wavelet-LLL_firstorder_10Percentile</p>                 |

Table 6. Effect of training size on the prediction power of radiomics features.

| Nodule Image   | Prediction Performance with Feature Fractioning (AUROC) |             |             |
|----------------|---------------------------------------------------------|-------------|-------------|
|                | 25%                                                     | 50%         | 70%         |
| Target nodule  | 0.827±0.006                                             | 0.843±0.008 | 0.859±0.011 |
| Context nodule | 0.822±0.008                                             | 0.847±0.007 | 0.863±0.016 |
| Combined       | 0.825±0.012                                             | 0.853±0.014 | 0.886±0.020 |

Table 7. Effect of training size on the prediction power of deep features.

| Nodule Image   | Prediction Performance with Feature Fractioning (AUROC) |             |             |
|----------------|---------------------------------------------------------|-------------|-------------|
|                | 25%                                                     | 50%         | 70%         |
| Target nodule  | 0.841±0.010                                             | 0.872±0.006 | 0.887±0.010 |
| Context nodule | 0.875±0.004                                             | 0.906±0.011 | 0.915±0.006 |
| Combined       | 0.883±0.004                                             | 0.901±0.011 | 0.920±0.009 |

Table 8. Statistical comparison of AUROC curves between radiomic features and deep features for original as well as augmented feature sets. Significant differences were marked in bold.

| Feature Type    | Radiomics vs. Deep Features ( <i>p-value</i> ) |                      |
|-----------------|------------------------------------------------|----------------------|
|                 | <i>Imbalanced Sets</i>                         | <i>Balanced Sets</i> |
| Target nodules  | <b>0.0021</b>                                  | <b>0.0032</b>        |
| Context nodules | 0.9477                                         | 0.2319               |
| Combined        | <b>0.0238</b>                                  | <b>0.0115</b>        |

Table 9. Statistical comparison of AUROC curves between target, context, and combined hybrid poos for original as well as augmented feature. Significant differences were marked in bold.

| Feature Type         | Hybrid Feature Sets ( <i>p-value</i> ) |                      |
|----------------------|----------------------------------------|----------------------|
|                      | <i>Imbalanced Sets</i>                 | <i>Balanced Sets</i> |
| Target vs. Context   | <b>0.0359</b>                          | <b>0.0153</b>        |
| Target vs. Combined  | 0.4315                                 | 0.1276               |
| Context vs. Combined | <b>0.0077</b>                          | <b>0.0005</b>        |
